# Supplementary material
Source: Elsevier journal article supplement (https://www.sciencedirect.com/science/article/pii/S1576988722000267)
Supplement: mmc1 [file S1576988722000267:mmc1.docx]

# Supplementary material

## Supplementary Table 1. Estimated incidence of herpes zoster in Spanish adults aged ≥ 50 years in different regional general practitioner (GP) networks

| **Age group (years)** | **Barcelona** | | | **Madrid** | | | **CSISP Valencia** | | |
| --- | --- | --- | --- | --- | --- | --- | --- | --- | --- |
| **N** | **Incidence per 1,000 PY** | **95% CI** | **N** | **Incidence per 1,000 PY** | **95% CI** | **N** | **Incidence per 1,000 PY** | **95% CI** |
| **50–54** | 15 | 2.13 | 1.19–3.51 | 21 | 2.55 | 1.58–3.90 | 8 | 3.89 | 1.68–7.66 |
| **55–59** | 18 | 2.87 | 1.70–4.54 | 33 | 4.59 | 3.16–6.45 | 12 | 7.51 | 3.88–13.13 |
| **60–64** | 18 | 3.26 | 1.93–5.15 | 29 | 4.50 | 3.01–6.46 | 11 | 8.25 | 4.12–14.75 |
| **65–69** | 22 | 4.00 | 2.51–6.06 | 43 | 7.03 | 5.08–9.46 | 12 | 8.88 | 4.59–15.50 |
| **70–74** | 23 | 4.92 | 3.12–7.39 | 33 | 7.17 | 4.94–10.07 | 9 | 7.64 | 3.49–14.50 |
| **75–79** | 21 | 5.66 | 3.50–8.65 | 26 | 6.11 | 3.99–8.95 | 11 | 10.10 | 5.04–18.07 |
| **≥80** | 30 | 4.06 | 2.74–5.79 | 50 | 7.23 | 5.37–9.54 | 14 | 8.61 | 4.71–14.45 |
| **All ≥50** | 147 | 3.67 | 3.10–4.31 | 235 | 5.37 | 4.71–6.10 | 77 | 7.52 | 5.94–9.40 |

CI = Exact Poisson confidence interval; CSISP = Centro Superior de Investigacion en Salud Pública; N = number of patients; PY = person-years

## Supplementary Figure 1. ZBPI questionnaire compliance across the study period (ATP cohort)


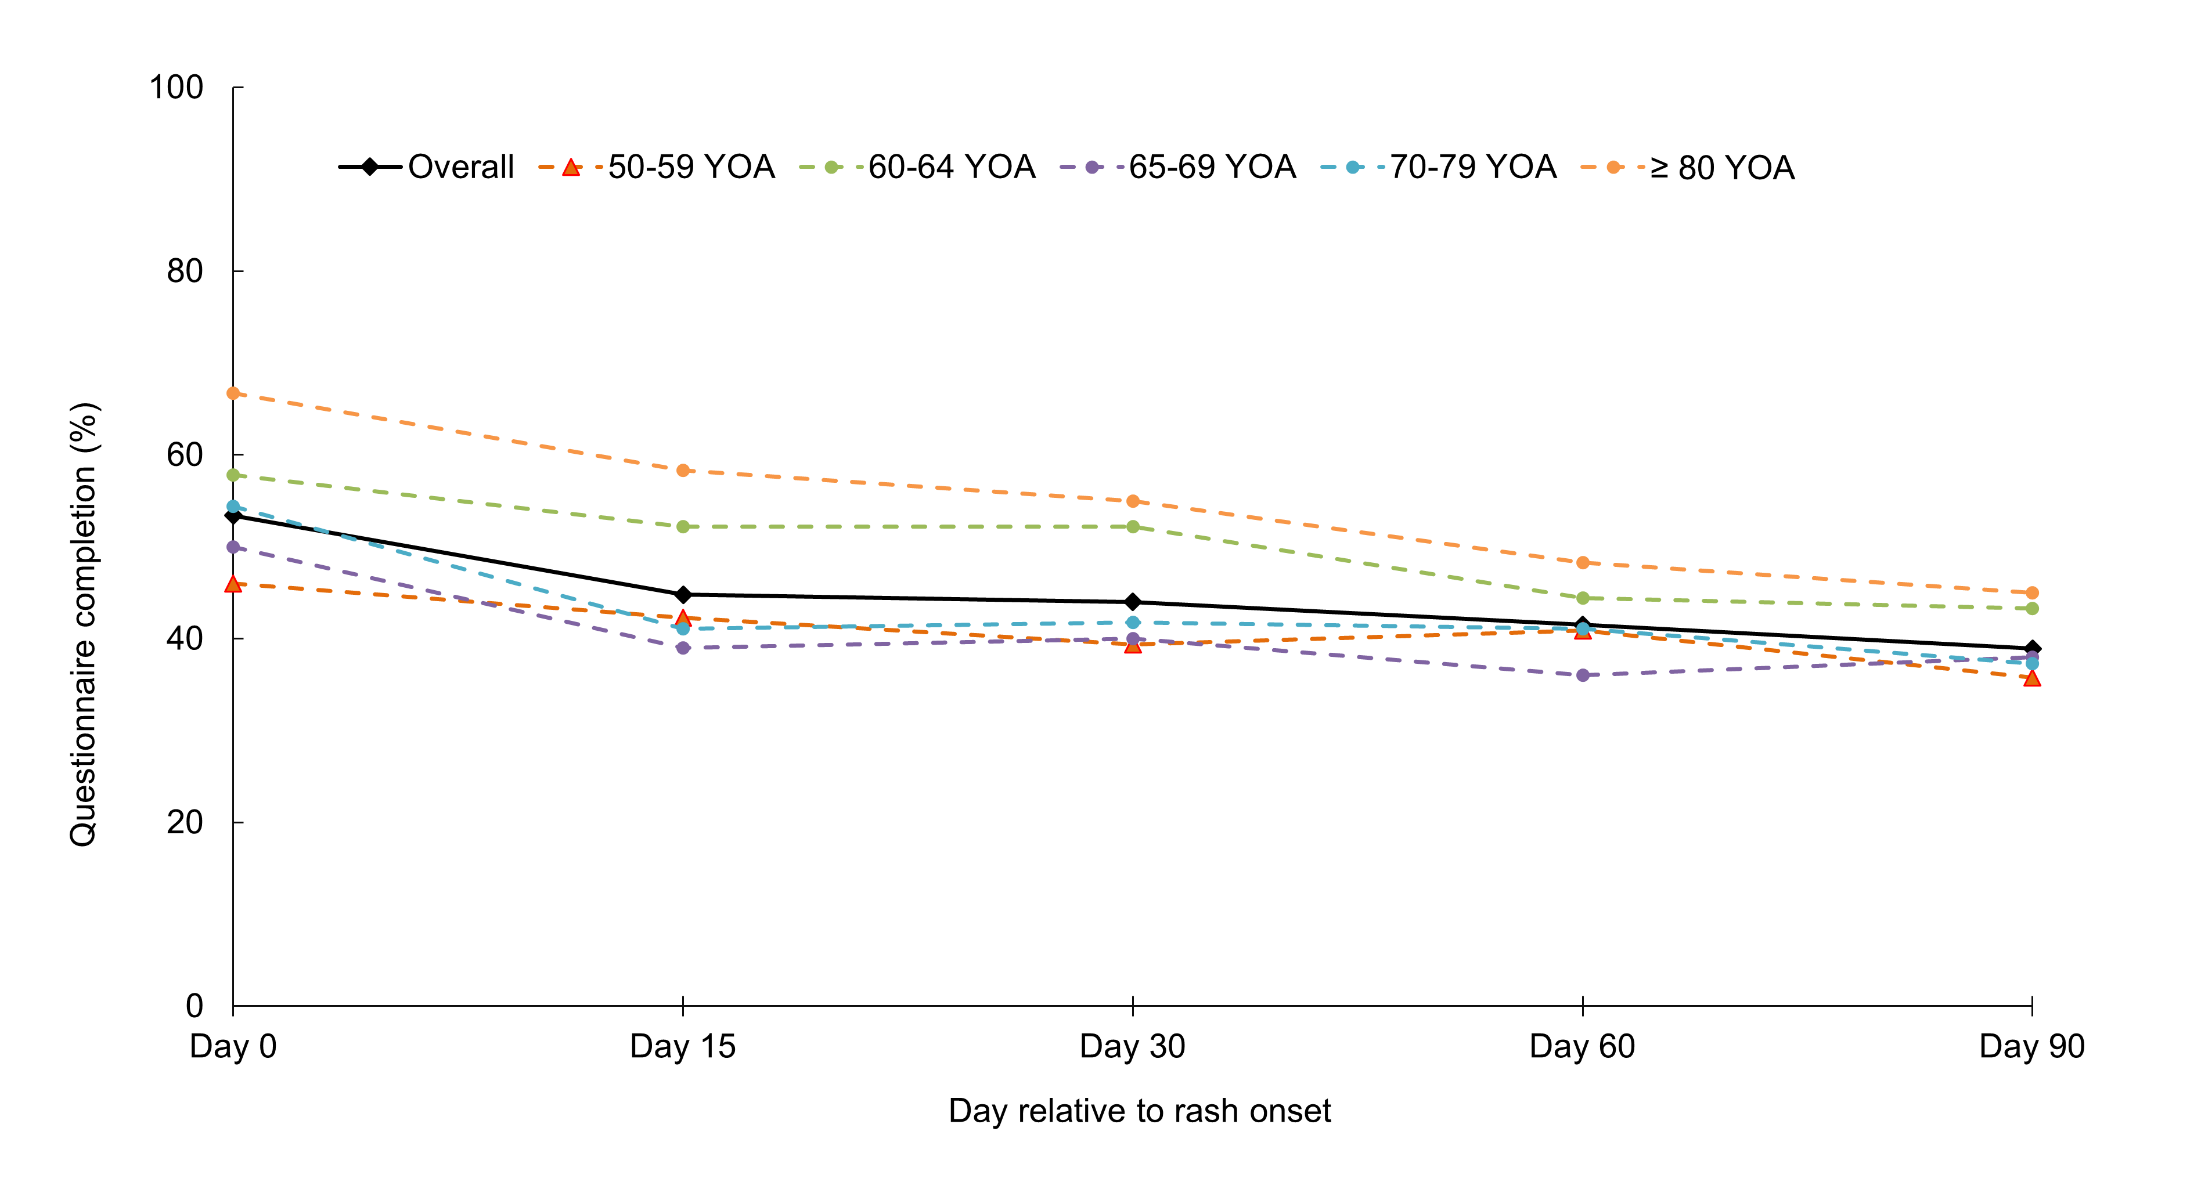


ATP = According to protocol; YOA = Years of age; ZBPI = Zoster brief pain inventory
